# Supplementary material for: Invasion and effective size of graph-structured populations
Source: PLOS journal article supplement (doi:10.1371/journal.pcbi.1006559), 2018-11-12
Supplement: S1 (10.1371/journal.pcbi.1006559.s001) [file journal.pcbi.1006559.s001]

# S1 Text: Invasion and effective population size of graph-structured populations

Stefano Giaimo<sup>1</sup>, Jordi Arranz<sup>1</sup>, and Arne Traulsen<sup>1</sup>

<sup>1</sup>Department of Evolutionary Theory  
Max Planck Institute for Evolutionary Biology  
August-Thienemann-Straße 2, 24306 Plön, Germany  
giaimo@evolbio.mpg.de

## Update processes

Let  $\mathbf{W} = [w_{i,j}]$  with  $w_{i,j} \geq 0$  and  $w_{i,i} = 0$  be the  $N \times N$  matrix representing an evolutionary graph of  $N$  nodes, where  $w_{i,j}$  is the weight on the arrow going from node  $j$  to node  $i$ . We observe the graph at discrete time steps  $t = 0, 1, 2, \dots$ . As defined in the main text,  $M(t) \subseteq U = \{1, 2, \dots, N\}$  gives the current mutant configuration on the graph. Residents have fitness  $\mathbf{z} = [z_1, z_2, \dots, z_N]^T$  where  $z_j > 0$  is the fitness of a resident at node  $j$ . Mutants have fitness  $\mathbf{r} = [r_1, r_2, \dots, r_N]^T$ , where  $r_j > 0$  is the fitness of a mutant at node  $j$ . Under Bd, the quantity  $y_{i,j}(t)$  in Eq. (1) of the main text is

$$y_{i,j}(t, \text{Bd}) = \begin{cases} \frac{z_j}{\sum_{k \in M(t)} r_k + \sum_{k \notin M(t)} z_k} \frac{w_{i,j}}{\sum_k w_{k,j}} & \text{if } j \text{ is a resident at } t \\ \frac{r_j}{\sum_{k \in M(t)} r_k + \sum_{k \notin M(t)} z_k} \frac{w_{i,j}}{\sum_k w_{k,j}} & \text{if } j \text{ is a mutant at } t \end{cases} \quad (1)$$

while under dB is

$$y_{i,j}(t, \text{dB}) = \begin{cases} \frac{1}{N} \frac{w_{i,j} z_j}{\sum_{k \in M(t)} w_{i,k} r_k + \sum_{k \notin M(t)} w_{i,k} z_k}, & \text{if } j \text{ is a resident at } t \\ \frac{1}{N} \frac{w_{i,j} r_j}{\sum_{k \in M(t)} w_{i,k} r_k + \sum_{k \notin M(t)} w_{i,k} z_k}, & \text{if } j \text{ is a mutant at } t \end{cases} \quad (2)$$

## Demographic variance

The demographic variance  $\sigma^2$  is the expected variance in individual contribution to reproductive value in the next time step [1]. Let  $\hat{v}_j = \sum_i v_i b_{i,j}$  be the contribution to reproductive value in the next time step of an individual in node  $j$ . Here  $b_{i,j}$  is a random variable for the number of individuals contributed to node  $i$  by an individual in node  $j$ . Therefore,  $\hat{v}_j$  is also a random variable with

|              | Birth-death (Bd)                                                   | death-Birth (dB)                                     |
|--------------|--------------------------------------------------------------------|------------------------------------------------------|
| complete     | $\frac{2}{N}$                                                      | $\frac{2}{N}$                                        |
| $k$ -regular | $\frac{2}{N}$                                                      | $\frac{2}{N}$                                        |
| star         | $\frac{N-1}{N} \frac{N(2N+1)-2}{[(N-1)^2+1]^2} \sim \frac{2}{N^2}$ | $\frac{2N^2+N-2}{4N(N-1)} \rightarrow \frac{1}{2}$   |
| wheel        | $\frac{4N^3-6N^2+18N-16}{3((N-1)^2+3)^2} \sim \frac{4}{3N}$        | $\frac{N+8}{8(N-1)} \rightarrow \frac{1}{8}$         |
| ceiling fan  | $\frac{(N-1)(N^2+3)}{(2+(N-1)^2)^2} \sim \frac{1}{N}$              | $\frac{2N^2+4N-6}{9(N-1)^2} \rightarrow \frac{2}{9}$ |
| line         | $\frac{2N+6}{(N+2)^2} \sim \frac{2}{N}$                            | $\frac{2N-3}{(N-1)^2} \sim \frac{2}{N}$              |

Table 1: Demographic variance  $\sigma^2$  for the five undirected graphs shown in Fig. 4 in the main text and their asymptotic for  $N \rightarrow \infty$ .

expectation  $\mathbb{E}(\hat{v}_j) = \lambda v_j$ , stable population growth times reproductive value at  $j$  (see main text). The corresponding variance is [3]

$$\text{Var}(\hat{v}_j) = \sum_i v_i^2 \text{Var}(b_{i,j}) + 2 \sum_{i < k} v_i^2 v_k^2 \text{Cov}(b_{i,j}, b_{k,j}) \quad (3)$$

The average variance of  $\hat{v}_j$  over all individuals at demographic stability when between-individual contributions are assumed independent is [3]

$$\sigma^2 = \sum_j u_j \text{Var}(\hat{v}_j) = \sum_j u_j \left[ \sum_i v_i^2 \text{Var}(b_{i,j}) + 2 \sum_{i < k} v_i^2 v_k^2 \text{Cov}(b_{i,j}, b_{k,j}) \right]. \quad (4)$$

The quantity  $\sigma^2$  for a neutral graph of  $N$  nodes is computed from the average projection matrix  $\mathbf{A}$ . In this case,  $u_j = \frac{1}{N}$  for all  $j$ . All  $\text{Var}(b_{i,j})$  terms in (4) are  $\text{Var}(b_{i,j}) = a_{i,j}(1 - a_{i,j})$ , because  $a_{i,j}$  is the mean of  $b_{i,j}$ , which in graphs can only take value 0 or 1 under both update processes, and  $a_{i,j}(1 - a_{i,j})$  is the corresponding variance. We now look at the covariance terms. Stasis/survival at node  $j$  and fertilities at the same node have positive covariance, as reproduction is conditional on survival. Let  $b_{j,j}$  and  $b_{i,j}$  be indicators for stasis in node  $j$  and offspring placement in node  $i \neq j$ , respectively. Then,  $\mathbb{E}(b_{j,j}) = a_{j,j}$ ,  $\mathbb{E}(b_{i,j}) = a_{i,j}$  and  $\mathbb{E}(b_{j,j}b_{i,j}) = a_{i,j}$ . Using  $\text{Cov}(x, y) = \mathbb{E}(xy) - \mathbb{E}(x)\mathbb{E}(y)$ , we obtain  $\text{Cov}(b_{j,j}, b_{i,j}) = a_{i,j}(1 - a_{j,j})$ . As for off-diagonal entries of column  $j$ , fertilities in node  $j$  have negative covariance between them, because in a reproduction event the offspring can be placed in only one node. Let  $b_{i,j}$  and  $b_{k,j}$  be indicators for offspring placement in  $i$  and offspring placement in  $k$  (where  $i \neq j$ ,  $k \neq i$  and  $k \neq j$ ), respectively. Then,  $\mathbb{E}(b_{i,j}b_{k,j}) = 0$  and  $\text{Cov}(b_{i,j}, b_{k,j}) = -a_{i,j}a_{k,j}$ . Substituting in Eq. (4) leads to the expression for the demographic variance of a graph in the main text. In Table 1, we report formulas for  $\sigma^2$  for several undirected graphs.

## Undirected graphs with node independent fitness

In undirected graphs with node independent fitness, residents have fitness 1, while beneficial mutants have fitness  $1 + s$  with  $s > 0$ . Then  $\mathbf{W}$  is the graph

adjacency matrix and  $w_{i,j}$  is an indicator variable that takes value 0 or 1 depending on the absence or presence, respectively, of a link between  $i$  and  $j$ . Let  $k_j$  be the degree (i.e. number of links) of node  $j$ . Then, for neutral populations ( $s = 0$ ) under Bd the probability that  $j$  is selected to reproduce is  $\frac{1}{N}$  for all  $j$  and the probability that  $j$  will place the offspring in node  $i \neq j$  is  $\frac{1}{k_j}$ . Hence,

$$a_{i,j} = \begin{cases} \frac{w_{i,j}}{Nk_j} & i \neq j \text{ and process is Bd} \\ 1 - \frac{1}{N} \sum_m \frac{w_{i,m}}{k_m} & i = j \text{ and process is Bd} \end{cases} \quad (5)$$

Under dB,  $i$  dies with probability  $\frac{1}{N}$  and each neighbor has a probability  $\frac{1}{k_i}$  of replacing  $i$  with an offspring. Hence,

$$a_{i,j} = \begin{cases} \frac{w_{i,j}}{Nk_i} & i \neq j \text{ and process is dB} \\ 1 - \frac{1}{N} & i = j \text{ and process is dB} \end{cases} \quad (6)$$

The reproductive value of  $i$  is proportional to  $k_i^{-1}$  under Bd and to  $k_i$  under dB [2]. In our scaling,

$$v_i = \begin{cases} \frac{N}{k_i \sum_j \frac{1}{k_j}} & \text{process is Bd} \\ \frac{Nk_i}{\sum_j k_j} & \text{process is dB} \end{cases} \quad (7)$$

Table 2 reports reproductive values for graphs in Fig. 4 of the main text.

To get  $\Delta\lambda$ , we slightly perturb the matrix  $\mathbf{A}$  by  $s$ . Differentiating and evaluating at  $s = 0$  leads to linear mutant deviations,

$$\Delta a_{i,j} = \begin{cases} s \frac{(N-1)w_{i,j}}{N^2 k_j} & i \neq j \text{ and process is Bd} \\ s \frac{1}{N^2} \sum_m \frac{w_{i,m}}{k_m} & i = j \text{ and process is Bd} \end{cases} \quad (8)$$

and

$$\Delta a_{i,j} = \begin{cases} s \frac{(k_i-1)w_{i,j}}{k_i^2 N} & i \neq j \text{ and process is dB} \\ 0 & i = j \text{ and process is dB} \end{cases} \quad (9)$$

Using Eq. (4) from the main text,

$$\Delta\lambda = \frac{1}{N} \sum_{i,j} v_i \Delta a_{i,j} \quad (10)$$

Table 3 reports computations of  $\Delta\lambda$  using this formula for graphs in Fig. 4.

Alternatively, the matrices  $\tilde{\mathbf{A}}$  can be formed without expressing mutant values as linear deviations from resident values. The quantity  $\Delta\lambda$  can be retrieved from the Perron root of these matrices. Under Bd, a single mutant in an otherwise resident population has a probability  $\frac{1+s}{N+s}$  of being selected for reproduction, while a resident individual has corresponding probability  $\frac{1}{N+s}$ .

|              | reproductive value (Bd)                                                                      | reproductive value (dB)                                                         |
|--------------|----------------------------------------------------------------------------------------------|---------------------------------------------------------------------------------|
| complete     | $v_j = 1$                                                                                    | $v_j = 1$                                                                       |
| $k$ -regular | $v_j = 1$                                                                                    | $v_j = 1$                                                                       |
| star         | $v_{\text{center}} = \frac{N}{(N-1)^2+1}$ $v_{\text{periphery}} = \frac{N(N-1)}{(N-1)^2+1}$  | $v_{\text{center}} = \frac{N}{2}$ $v_{\text{periphery}} = \frac{N}{2(N-1)}$     |
| wheel        | $v_{\text{center}} = \frac{3N}{(N-1)^2+3}$ $v_{\text{periphery}} = \frac{N(N-1)}{(N-1)^2+3}$ | $v_{\text{center}} = \frac{N}{4}$ $v_{\text{periphery}} = \frac{3N}{4(N-1)}$    |
| ceiling fan  | $v_{\text{center}} = \frac{2N}{(N-1)^2+2}$ $v_{\text{periphery}} = \frac{N(N-1)}{(N-1)^2+2}$ | $v_{\text{center}} = \frac{N}{3}$ $v_{\text{periphery}} = \frac{2N}{3(N-1)}$    |
| line         | $v_{\text{extremity}} = \frac{2N}{N+2}$ $v_{\text{interior}} = \frac{N}{N+2}$                | $v_{\text{extremity}} = \frac{N}{2(N-1)}$ $v_{\text{interior}} = \frac{N}{N-1}$ |

Table 2: Reproductive values for the undirected graphs shown in Fig. 4.

|              | $\partial\lambda/\partial s _{s=0}$ (Bd)                         | $\partial\lambda/\partial s _{s=0}$ (dB)       |
|--------------|------------------------------------------------------------------|------------------------------------------------|
| complete     | $\frac{1}{N}$                                                    | $\frac{1}{N} \frac{N-2}{N-1} \sim \frac{1}{N}$ |
| $k$ -regular | $\frac{1}{N}$                                                    | $\frac{1}{N} \frac{k-1}{k}$                    |
| star         | $\frac{2N(N-1)}{N^2[(N-1)^2+1]} \sim \frac{2}{N^2}$              | $\frac{N-2}{2N(N-1)} \sim \frac{1}{2N}$        |
| wheel        | $\frac{2(N-1)[(N-1)^2+4N-1]}{3N^2[(N-1)^2+3]} \sim \frac{2}{3N}$ | $\frac{3N-4}{4N(N-1)} \sim \frac{3}{4N}$       |
| ceiling fan  | $\frac{(N-1)[(N-1)^2+5N-1]}{2N^2[(N-1)^2+2]} \sim \frac{1}{2N}$  | $\frac{2N-3}{3N(N-1)} \sim \frac{2}{3N}$       |
| line         | $\frac{N+1}{N(N+2)} \sim \frac{1}{N}$                            | $\frac{N-2}{2N(N-1)} \sim \frac{1}{2N}$        |

Table 3: Sensitivity of  $\lambda$  to a small change in node-independent fitness for graphs in Fig. 4 and their asymptotic behavior for  $N \rightarrow \infty$ .

|                    | Selective RV-advantage $\Delta\lambda$ (Bd)                                                                                                              |
|--------------------|----------------------------------------------------------------------------------------------------------------------------------------------------------|
| complete           | $\frac{s}{N+s}$                                                                                                                                          |
| $k$ -regular graph | $\frac{s}{N+s}$                                                                                                                                          |
| star               | $\frac{1}{N+s} \left[ 1 - \frac{N^2}{2(N-1)} + \sqrt{(1+s)^2 + \left( \frac{N(N-2)}{2(N-1)} \right)^2} \right]$                                          |
| wheel              | $\frac{1}{6(N+s)} \left[ 2(1+s) - \frac{N^2-2}{N-1} + 1 + s \sqrt{\left( 4 + \frac{N(N-4)}{(1+s)(N-1)} \right)^2 - \frac{4N(N-4)}{(1+s)(N-1)}} \right]$  |
| ceiling fan        | $\frac{1}{4(N+s)} \left[ 1 + s - \frac{N^2-N+2}{N-1} + 1 + s \sqrt{\left( 3 + \frac{N(N-3)}{(1+s)(N-1)} \right)^2 - \frac{4N(N-3)}{(1+s)(N-1)}} \right]$ |

Table 4: Selective RV-advantage under Bd computed from the Perron root of the matrix  $\tilde{\mathbf{A}}$ .

|                    | Selective RV-advantage $\Delta\lambda$ (dB)                                                                  |
|--------------------|--------------------------------------------------------------------------------------------------------------|
| complete           | $\frac{s(N-2)}{N(N-1+s)}$                                                                                    |
| $k$ -regular graph | $\frac{s(k-1)}{N(k+s)}$                                                                                      |
| star               | $\frac{1}{N} \left( \sqrt{\frac{(1+s)(N-1)}{N-1+s}} - 1 \right)$                                             |
| wheel              | $\frac{1}{N} \left[ \frac{1+s}{3+s} \left( 1 + \sqrt{\frac{s+4(N-1)}{N-1+s}} \right) - 1 \right]$            |
| ceiling fan        | $\frac{1}{N(2+s)} \left[ \frac{1+s}{2} \left( \sqrt{\frac{5N+(4N-3)(1+s)-6}{N-1+s}} - 1 \right) - 1 \right]$ |

Table 5: Selective RV-advantage under dB computed from the Perron root of the matrix  $\tilde{\mathbf{A}}$ .

Hence,

$$\tilde{a}_{i,j} = \begin{cases} \frac{(1+s)w_{i,j}}{(N+s)k_j} & i \neq j \text{ and process is Bd} \\ 1 - \frac{1}{N+s} \sum_{m \neq i} \frac{w_{i,m}}{k_m} & i = j \text{ and process is Bd} \end{cases} \quad (11)$$

Under dB, a single mutant in  $j$  within an otherwise resident population has a probability  $\frac{1+s}{k_i+s}$  of being selected to reproduce given  $i \neq j$  is selected to die. Hence,

$$\tilde{a}_{i,j} = \begin{cases} \frac{(1+s)w_{i,j}}{N(k_i+s)} & i \neq j \text{ and process is dB} \\ 1 - \frac{1}{N} & i = j \text{ and process is dB} \end{cases} \quad (12)$$

Note that the left eigenvector problem  $\mathbf{c}\tilde{\mathbf{A}} = \lambda\mathbf{c}$  may sometimes be simplified to fewer than  $N$  equations leading to an explicit expression for  $\tilde{\lambda}$  (the Perron root). This is done by noting that  $\mathbf{c}$  is the invading mutant reproductive value vector. A regular graph appears identical from every node to a single invader and mutant reproductive value must be equal at all nodes. Then  $\mathbf{c}$  has all components scaled to 1 and the eigenvector problem reduces to a single linear equation in  $\lambda$ . In star, ceiling fan and wheel graphs, we have only two classes of nodes and, similarly, we obtain a reduction from  $N$  to 2 equations (a quadratic problem in  $\lambda$  where  $\tilde{\lambda}$  is the greatest root). This is done by noting that mutant reproductive value can only be different between the central node and any periphery node. Tables 4-5 report  $\Delta\lambda$  computed with this approach for several graph structures. In the case of the line, the strategy is not as effective. Let us number nodes from 1 to  $N$  consecutively along the line. If  $N$  is even, then nodes  $j$  and  $N-j+1$  (with  $1 \leq j \leq \frac{N}{2}$ ) look identical to an invading mutant. Every node is in one of such pairs. Therefore, the possible reduction in the number of equations is from  $N$  to  $\frac{N}{2}$ . If  $N$  is odd, then nodes  $j$  and  $N-j+1$  (with  $1 \leq j \leq \frac{N-1}{2}$ ) look identical to an invading mutant. Every node is in one of such pairs except node  $\frac{N-1}{2} + 1$ , which should be treated separately. Therefore, the reduction in the number of equations is from  $N$  to  $\frac{N-1}{2} + 1$ .

## References

- [1] Steinar Engen, Russell Lande, Bernt-Erik Sæther, and F Stephen Dobson. Reproductive value and the stochastic demography of age-structured populations. *The American Naturalist*, 174(6):795–804, 2009.
- [2] W. Maciejewski. Reproductive value on evolutionary graphs. *Journal of Theoretical Biology*, 340:285–293, 2014.
- [3] Yngvild Vindenes, Aline Magdalena Lee, Steinar Engen, and Bernt-Erik Sæther. Fixation of slightly beneficial mutations: effects of life history. *Evolution*, 64:1063–1075, 2009.
